# Supplementary material for: Accounting for Space — Quantification of Cell-To-Cell Transmission Kinetics Using Virus Dynamics Models
Source: MDPI journal article supplement (doi:10.3390/v10040200), 2018-04-17
Supplement: s1 [file s1]

**Table S2: Estimates for the aCC-model given multiple foci using different fixed values for the assumed number of neighbors per cell,  $k$ .**

| <b>Parameter</b>                                              | $k = 4$           | <b><math>k = 6</math></b> | $k = 8$           | $k = 15$             |
|---------------------------------------------------------------|-------------------|---------------------------|-------------------|----------------------|
| $\beta_c$ ( $\times 10^{-6} \text{h}^{-1} \text{cell}^{-1}$ ) | 1.72 [1.70, 1.73] | 1.72 [1.70, 1.74]         | 1.72 [1.70, 1.73] | 1.71 [1.70, 1.72]    |
| $\theta$                                                      | 2.73 [2.66, 2.78] | 1.78 [1.70, 1.86]         | 1.32 [1.29, 1.37] | 0.69 [0.67, 0.71]    |
| $z$ (cells)                                                   | 2.44 [0.22, 4.80] | 2.19 (0, 6.61]            | 1.12 (0, 8.55]    | $10^{-5}$ (0, 15.05] |
| AICc                                                          | 75.7              | 75.3                      | 75.2              | 75.6                 |

Data were simulated using  $k = 6$ . Numbers in brackets represent 95%-confidence intervals for estimates based on  $10^4$  individual fits. Corrected AIC-values indicate model performance. Parameters include the cell-to-cell transmission rate,  $\beta_c$ , the number of infected cells over which the transition term for the smooth approximation spans,  $z$ , and the parameter  $\theta$  scaling for irregular foci growth (see also Text S1 for a detailed explanation of the parameters). The results show that the estimates for the cell-to-cell transmission rate  $\beta_c$  are robust for deviations in the assumed underlying neighbor-distribution  $k$ .
