# Supplementary material for: Accounting for Space — Quantification of Cell-To-Cell Transmission Kinetics Using Virus Dynamics Models
Source: MDPI journal article supplement (doi:10.3390/v10040200), 2018-04-17
Supplement: s1 [file s1]

**Figure S1: Profile likelihood analysis for parameters estimates that characterize the adjustment term considering single focus growth.**

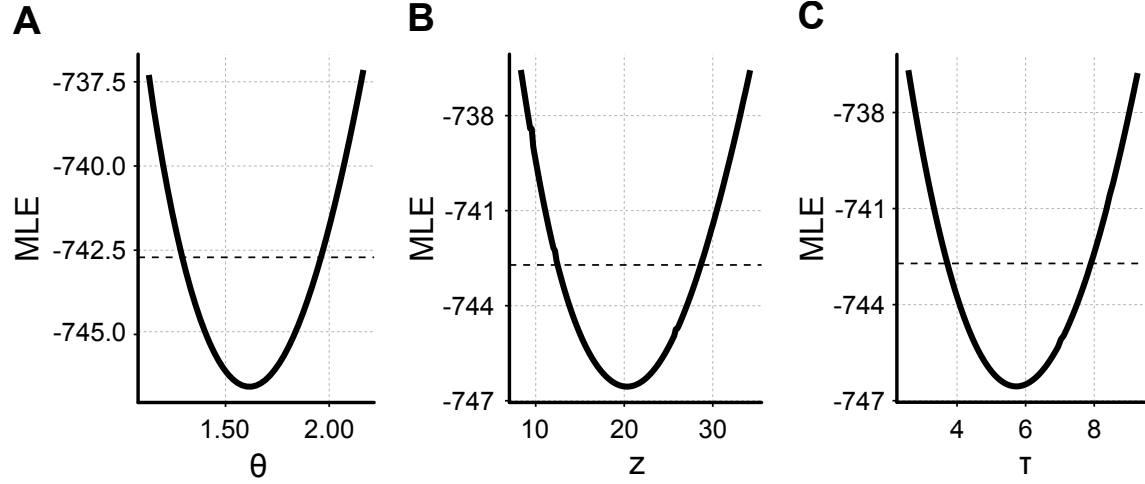

All profiles indicate the identifiability of the parameters based on the simulated data. **(A)** Profile likelihood for the parameter  $\theta := \phi\psi$ , where  $\psi$  defines a measure of non-circular focus shapes and  $\phi$  the number of initially seeded foci (see also *Supplementary Material Text S1*). **(B)** Profile likelihood for the interval length,  $z$ , for which the smooth connection term,  $f_2$  of our adjustment is applicable. **(C)** Profile likelihood for the time delay,  $\tau$ , for infected cells to become infectious.
