# Supplementary material for: Accounting for Space — Quantification of Cell-To-Cell Transmission Kinetics Using Virus Dynamics Models
Source: MDPI journal article supplement (doi:10.3390/v10040200), 2018-04-17
Supplement: s1 [file s1]

**Table S1: Parameters used in the agent-based model to simulate viral spread.**

| Parameter              | Description                                                   | Unit                                          | Value                 |
|------------------------|---------------------------------------------------------------|-----------------------------------------------|-----------------------|
| cells                  | Total nbr. of cells per well                                  | cells                                         | 24031                 |
| $t_{\text{sim}}$       | Simulation time                                               | h                                             | 240                   |
| $t_{\text{init}}$      | Initialization period                                         | $\text{h}^{-1}$                               | 17                    |
| $\alpha_{\text{init}}$ | Infection probability during initialization period            | $\text{h}^{-1}$                               | $6 \times 10^{-3}$    |
| $c_{\text{init}}$      | Average number of cells infected during initialization period | cells                                         | 35                    |
| $R_0$                  | Initial positive-strand RNA at infection                      | RNA                                           | 1                     |
| $\alpha$               | Maximal RNA production rate                                   | $\text{h}^{-1}$                               | 0.446                 |
| $\rho$                 | Export rate for enveloped virus                               | $\text{h}^{-1}$                               | $2.01 \times 10^{-3}$ |
| $\gamma$               | Degradation rate of intracellular RNA                         | $\text{h}^{-1}$                               | 0.2                   |
| $R_{\text{cap}}$       | Capacity of intracellular RNA per infected cell               | RNA                                           | 2369                  |
| $s_{\text{f}}$         | scaling factor for CF transmission probability                | $(\text{h} \times \text{intrac. RNA})^{-1}$   | 49.2                  |
| $s_{\text{c}}$         | scaling factor for CC transmission probability                | $(\text{h} \times \text{extrac. Virus})^{-1}$ | 1680                  |
| $f_{\text{inf}}$       | Fraction of infectious virus per intracellular RNA            |                                               | $1 \times 10^{-3}$    |
| $m$                    | Diffusion parameter (slow)                                    | $\mu\text{m}^2 \text{ h}^{-1}$                | $3.75 \times 10^1$    |
| $m$                    | Diffusion parameter (fast)                                    | $\mu\text{m}^2 \text{ h}^{-1}$                | $6.25 \times 10^3$    |
| $c$                    | Loss of infectivity of extracellular virus                    | $\text{h}^{-1}$                               | $6.34 \times 10^{-2}$ |

For simulations shown in Figure 6(D-F), values of  $s_{\text{c}} = 1 \times 10^{-5} (\text{min} \times \text{intrac. RNA})^{-1}$  and  $s_{\text{f}} = 1 \times 10^{-4} (\text{min} \times \text{extrac. Virus})^{-1}$  were used.
